# Supplementary material for: Multiplexing rhythmic information by spike timing dependent plasticity
Source: PLOS journal article supplement (doi:10.1371/journal.pcbi.1008000), 2020-06-29
Supplement: S2 (10.1371/journal.pcbi.1008000.s002) [file journal.pcbi.1008000.s002]

# Supplementary Information: Multiplexing asymmetric signals

Nimrod Sherf<sup>1,2\*</sup>, Maoz Shamir<sup>1,2,3</sup>

**1** Physics Department, Ben-Gurion University of the Negev, Beer-Sheva, Israel

**2** Zlotowski Center for Neuroscience, Ben-Gurion University of the Negev, Beer-Sheva, Israel

**3** Department of Physiology and Cell Biology Faculty of Health Sciences, Ben-Gurion University of the Negev, Beer-Sheva, Israel

\* sherfnim@post.bgu.ac.il

## Multiplexing asymmetric signals

To investigate the robustness of our results with respect to asymmetric signals we study the effect of different strengths for the intensity parameters of the different features  $D_1$  and  $D_2$ . For simplicity, we further assume that the intensity parameters,  $D_1$  and  $D_2$ , do not fluctuate but remain constant in time, and that  $\gamma_\eta = A_\eta/D_\eta \equiv \gamma$  is independent of  $\eta$ .

In this case, the cross-correlation between the  $j$ th neuron in population 1 and the downstream neuron can be written as

$$\Gamma_{(1,j), \text{ post}}(\Delta t) = \frac{D_1}{N} \delta(\Delta t - d) w_{1,j} + D_1^2 \bar{w}_1 + \frac{\gamma^2 D_1^2}{2} \tilde{w}_1 \cos[\nu_1(\Delta t - d) + \phi_{1,j} - \psi_1] + D_1 D_2 \bar{w}_2, \quad (1)$$

The STDP dynamics in the continuum limit is given by

$$\frac{\dot{w}_1(\phi, t)}{\lambda} = F_{1,d}(\phi, t) + \bar{w}_1(t) F_{1,0}(\phi, t) + \tilde{w}_1(t) F_{1,1}(\phi, t) + \bar{w}_2(t) F_{1,0}(\phi, t) \frac{D_2}{D_1}, \quad (2)$$

where,

$$F_{1,d}(\phi, t) = w_1(\phi, t) \frac{D_1}{N} \left( f_+(w_1(\phi, t)) K_+(d) - f_-(w_1(\phi, t)) K_-(d) \right), \quad (3a)$$

$$F_{1,0}(\phi, t) = D_1^2 \left( \bar{K}_+ f_+(w_1(\phi, t)) - \bar{K}_- f_-(w_1(\phi, t)) \right), \quad (3b)$$

$$F_{1,1}(\phi, t) = \frac{A_1^2}{2} \left( \tilde{K}_+ f_+(w_1(\phi, t)) \cos[\phi - \Omega_+^1 - \nu_1 d - \psi_1] - \tilde{K}_- f_-(w_1(\phi, t)) \cos[\phi - \Omega_-^1 - \nu_1 d - \psi_1] \right). \quad (3c)$$

The homogeneous fixed point obeys

$$\frac{f_-(w^*)}{f_+(w^*)} = \frac{1 + Z_+}{1 + Z_-} \equiv \alpha_c, \quad (4)$$

where

$$Z_{\pm} \equiv \frac{1}{(D_1 + D_2)N} K_{\pm}(d). \quad (5)$$

Performing standard stability analysis yields

$$\begin{aligned} \delta \dot{w}_{1,j} = & -\hat{g}_{0,1} \delta w_{1,j} - \Delta f(w^*) (\delta \bar{w}_1 + \frac{D_2}{D_1} \delta \bar{w}_2) + \frac{A_1^2}{2D_1^2} (f_+(w^*) \tilde{K}_+(\nu_1) \cos[\phi_{1,j} \\ & - \Omega_+^1 - \nu_1 d - \psi_1] - f_-(w^*) \tilde{K}_-(\nu_1) \cos[\phi_{1,j} - \Omega_-^1 - \nu_1 d - \psi_1]) \delta \bar{w}_1. \end{aligned} \quad (6)$$

with

$$\begin{aligned} \hat{g}_{0,1} = & \left( \frac{D_1 + D_2}{D_1} \right) \left( \alpha \mu (1 + Z_-) \frac{w^{*\mu}}{1 - w^*} \right) + \frac{K_+(d)}{D_1 N} f_+(w^*) - \frac{K_-(d)}{D_1 N} f_-(w^*) \\ = & \left( \frac{D_1 + D_2}{D_1} \right) (g_{0,1} - \Delta f(w^*)), \end{aligned} \quad (7)$$

where

$$g_0 \equiv \alpha \mu (1 + Z_-) \frac{w^{*\mu}}{1 - w^*}. \quad (8)$$

As in the case of multiplexing symmetric signals, the stability matrix has four prominent eigenvalues: two are the rhythmic modes and two are in the subspace of uniform fluctuations. As in the symmetric case, the uniform modes of fluctuations,  $\delta \bar{\mathbf{w}}^\top = (\delta \bar{w}_1, \delta \bar{w}_2)$ , span an invariant subspace of the stability matrix, and we can study the restricted stability matrix,  $\bar{\mathbf{M}}$ .

For  $D_1 \neq D_2$  the restricted stability matrix,  $\bar{\mathbf{M}}$ , is not symmetric, and its eigenvalues are given by

$$\bar{\lambda}_1 = -\frac{1}{2D_2} \left( \frac{(D_1 + D_2)^2}{D_1} g_0 - \frac{D_1^2 + D_2^2}{D_1} \Delta f(w^*) \right) - \frac{1}{2D_2} \sqrt{\Delta} \quad (9a)$$

$$\lambda_2 = -\frac{1}{2D_2} \left( \frac{(D_1 + D_2)^2}{D_1} g_0 - \frac{D_1^2 + D_2^2}{D_1} \Delta f(w^*) \right) + \frac{1}{2D_2} \sqrt{\Delta}. \quad (9b)$$

where

$$\Delta = \hat{g}_{0,1} (D_2 - D_1)^2 + 4\Delta f(w^*)^2 D_2^2. \quad (10)$$

The corresponding eigenvectors are

$$\mathbf{v}_1^\top = \left( \frac{1}{2\Delta f(w^*) D_1} (\hat{g}_0 (D_2 - D_1) + \sqrt{\Delta}), 1 \right) \quad (11a)$$

$$\mathbf{v}_2^\top = \left( \frac{1}{2\Delta f(w^*) D_1} (\hat{g}_0 (D_2 - D_1) - \sqrt{\Delta}), 1 \right) \quad (11b)$$

The first eigenvalue,  $\bar{\lambda}_1$ , is always negative and exhibits similar behaviour as the uniform eigenvalue,  $\bar{\lambda}_u$ . The second eigenvalue,  $\lambda_2$ , can change its sign and become unstable. Moreover, in the limit of  $(D_1 - D_2) \rightarrow 0$ :  $\bar{\lambda}_1 \rightarrow \bar{\lambda}_u$ ,  $\mathbf{v}_1^\top \rightarrow \mathbf{v}_u^\top = (1, 1)$ , and  $\bar{\lambda}_2 \rightarrow \bar{\lambda}_{\text{WTA}}$ ,  $\mathbf{v}_2^\top \rightarrow \mathbf{v}_{\text{WTA}}^\top = (1, -1)$ . Thus,  $\lambda_2$  represents the competitive eigenvalue. Instability of  $\lambda_2$  can generate a winner-take-all competition that will prevent multiplexing. Nevertheless,  $\lambda_2$  is continuous in  $(D_1 - D_2)$ ; thus, one expects a range of parameters in which  $\lambda_2$  will be stable.

The rhythmic eigenvalues of the stability matrix are given by

$$\tilde{\lambda}_{\nu_\eta} = -\hat{g}_{0,1}(\delta_{1\eta} + \frac{D_1}{D_2}\delta_{2\eta}) + \frac{\gamma^2}{2}f_+(w^*)\tilde{Q} \quad (12)$$

$$\tilde{Q} = \tilde{K}_+(\nu_\eta) \cos[\Omega_+^\eta + \nu_\eta d] - \alpha_c \tilde{K}_-(\nu_\eta) \cos[\Omega_-^\eta + \nu_\eta d], \quad (\eta = 1, 2). \quad (13)$$

Thus, the rhythmic eigenvalue behaves in a qualitatively similar manner to the symmetric case. Fig S2 presents simulation results in the case where  $D_1 = 3D_2$ . As can be seen, despite the asymmetry between the two signals, both are transmitted downstream.
